# Supplementary material for: Distinct polyadenylation landscapes of diverse human tissues revealed by a modified PA-seq strategy
Source: PubMed Central journal article supplement (PMC3848854; doi:10.1186/1471-2164-14-615), 2013-09-11

**Additional file 3. Distribution of non-redundant PA-seq 3' reads relative to annotated RefSeq poly(A) sites.**

For genes with multiple annotated PA sites in RefSeq database, only the longest poly(A) site is included.

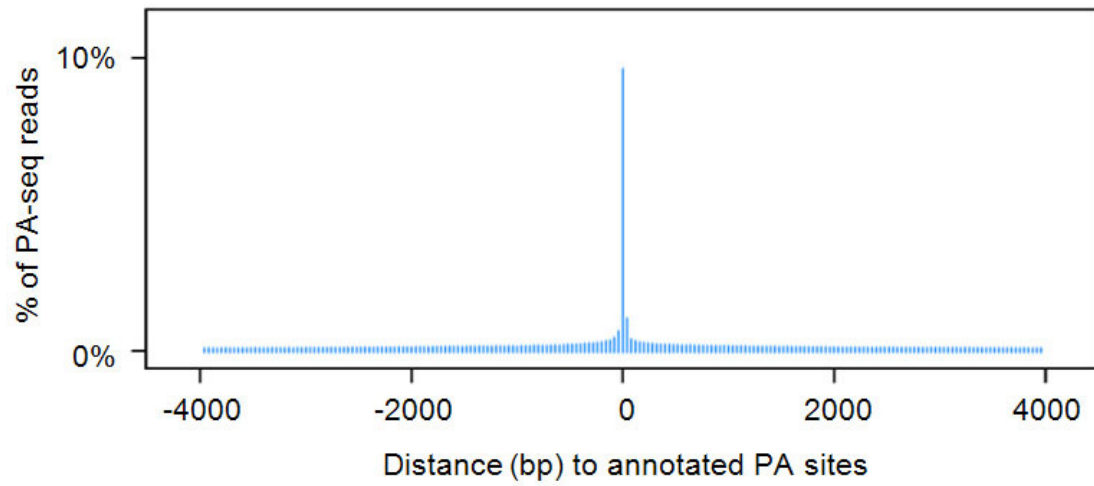

Supplement: 1471-2164-14-615-S3.pdf [file 1471-2164-14-615-S3.pdf]
