# Supplementary material for: Distinct polyadenylation landscapes of diverse human tissues revealed by a modified PA-seq strategy
Source: PubMed Central journal article supplement (PMC3848854; doi:10.1186/1471-2164-14-615), 2013-09-11

**Additional file 4. Expression correlation between Affymetrix array and PA-seq data.** Log2 transformed values of Affymetrix array (X axis) and PA-seq reads (Y axis) in liver are shown. R denotes correlation coefficient. For PA-seq, total mappable reads were used for expression comparison.

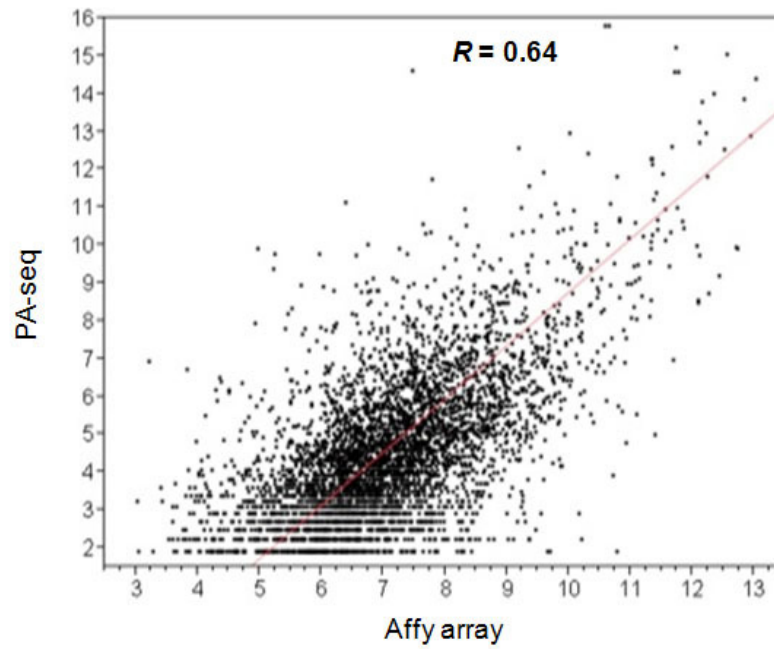

Supplement: 1471-2164-14-615-S4.pdf [file 1471-2164-14-615-S4.pdf]
