# Supplementary material for: Distinct polyadenylation landscapes of diverse human tissues revealed by a modified PA-seq strategy
Source: PubMed Central journal article supplement (PMC3848854; doi:10.1186/1471-2164-14-615), 2013-09-11
Supplement: 1471-2164-14-615-S13.pdf [file 1471-2164-14-615-S13.pdf]

**Additional file 13. GO analysis of genes (top right corner in dashed square) in Adult**

**Brain**

| Category      | Term                                     | Count | %        | P Value  |
|---------------|------------------------------------------|-------|----------|----------|
| GOTERM_CC_FAT | GO:0045202~synapse                       | 49    | 6.843575 | 2.15E-14 |
| GOTERM_CC_FAT | GO:0044456~synapse part                  | 37    | 5.167598 | 4.33E-12 |
| GOTERM_BP_FAT | GO:0007268~synaptic transmission         | 38    | 5.307263 | 6.33E-11 |
| GOTERM_BP_FAT | GO:0019226~transmission of nerve impulse | 41    | 5.726257 | 1.36E-10 |
| GOTERM_CC_FAT | GO:0043005~neuron projection             | 39    | 5.446927 | 3.99E-09 |
| GOTERM_BP_FAT | GO:0050877~neurological system process   | 83    | 11.59218 | 2.32E-08 |
| GOTERM_BP_FAT | GO:0007616~long-term memory              | 8     | 1.117318 | 5.61E-08 |
| GOTERM_CC_FAT | GO:0005886~plasma membrane               | 201   | 28.07263 | 6.70E-08 |
| GOTERM_MF_FAT | GO:0022836~gated channel activity        | 33    | 4.608939 | 2.17E-07 |
| GOTERM_MF_FAT | GO:0015267~channel activity              | 39    | 5.446927 | 2.97E-07 |
