# Supplementary material for: Distinct polyadenylation landscapes of diverse human tissues revealed by a modified PA-seq strategy
Source: PubMed Central journal article supplement (PMC3848854; doi:10.1186/1471-2164-14-615), 2013-09-11
Supplement: 1471-2164-14-615-S16.pdf [file 1471-2164-14-615-S16.pdf]

**Additional file 16. Comparison of PA peaks identified by PolyA-seq (Derti) and PA-seq (this study).**

|                                           | <b>Peaks <math>\geq</math> 50 tags*</b> | <b>Peaks that overlap RefSeq annotation**</b> |
|-------------------------------------------|-----------------------------------------|-----------------------------------------------|
| <b>Our Kidney Dataset</b>                 | 6,646                                   | 3,914 (58.9%)                                 |
| <b>Derti's Kidney Dataset (SRR299107)</b> | 7,606                                   | 3,510 (46.1%)                                 |

\* The starting bed file for F-seq peak calling is based on bwa mapping allowing maximum 2 mismatches (see Additional Table 6 for details). We used paired-end mapping for our kidney dataset and single end mapping for Derti's kidney dataset.

\*\* The percentage of peaks overlap RefSeq annotation (within  $\pm$ 5bp of known PA sites) was indicated in parentheses.
